# Supplementary material for: Adaptive Laboratory Evolution of Halomonas bluephagenesis Enhances Acetate Tolerance and Utilization to Produce Poly(3-hydroxybutyrate)
Source: MDPI journal article supplement (doi:10.3390/molecules27093022), 2022-05-08
Supplement: s1 [file s1]

# Supporting Information

**Table S1.** Mutations with gene annotation in B71.

| NCBI number    | Gene                                                                    | Position   | Description                                                                             | Amino acid change                                         |
|----------------|-------------------------------------------------------------------------|------------|-----------------------------------------------------------------------------------------|-----------------------------------------------------------|
| WP_009721770.1 | Disulfide bond formation protein B                                      | Downstream | 540552: A→C 540558: G→A                                                                 |                                                           |
| WP_009723049.1 | FAD-binding oxidoreductase                                              | Exonic     | 322953: G→T 322956: T→C                                                                 | 185: Gly→Pro<br>186: Gly→Ser                              |
| WP_009723961.1 | Methyl-accepting chemotaxis protein                                     | Upstream   | 264288: C→G 264289: C→A                                                                 |                                                           |
| WP_009724034.1 | BCCT family transporter, partial                                        | Exonic     | 23041: T→G 23045: C→A                                                                   | 4: Gly→Trp<br>5: Glu→Ala                                  |
| WP_009724067.1 | Acetoacetyl-CoA reductase                                               | Exonic     | 59629: G→C 59636: G→T                                                                   | 26: Ala→Ala<br>29: Gly→Cys                                |
| WP_009724268.1 | RHS repeat-associated core domain-containing protein                    | Exonic     | 272181: A→C                                                                             | 18: Met→Arg                                               |
| WP_009724802.1 | YadA-like family protein, partial                                       | Downstream | 52363: G→C 52366: G→T 52375: C→A 52376: C→A 52378: G→T 52382: A→C 52405: G→T            |                                                           |
| WP_009724919.1 | 23S rRNA (cytidine(2498)-2'-O)-methyltransferase RlmM                   | Upstream   | 57: A→G                                                                                 |                                                           |
| WP_009725047.1 | RHS repeat-associated core domain-containing protein                    | Exonic     | 28820: G→C                                                                              | 150: His→Gln                                              |
| WP_143759813.1 | Filamentous hemagglutinin N-terminal domain-containing protein          | Exonic     | 7973: C→T                                                                               | 1128Ala→Val                                               |
| WP_009725065.1 | Hemolysin, partial                                                      | Exonic     | 464: G→T                                                                                | 127: Ala→Asp                                              |
| WP_009725067.1 | Adhesin/hemolysin, partial                                              | Exonic     | 47: G→A                                                                                 | 175: Pro→Leu                                              |
| WP_009723841.1 | 5'-nucleotidase C-terminal Domain-containing protein                    | Exonic     | 142078: 118 bp In <sup>a</sup>                                                          |                                                           |
| WP_009723961.1 | Methyl-accepting chemotaxis protein                                     | Upstream   | 264294: 44 bp In <sup>a</sup>                                                           |                                                           |
| WP_009724034.1 | BCCT family transporter, partial                                        | Exonic     | 23050: 30 bp In <sup>a</sup>                                                            |                                                           |
| WP_050801109.1 | Cell envelope integrity protein TolA                                    | Exonic     | 175429: 30 bp In <sup>a</sup>                                                           |                                                           |
| WP_009724795.1 | YadA-like family protein                                                | Exonic     | 35412: 158 bp DI <sup>b</sup>                                                           |                                                           |
| WP_083817087.1 | Histidinol-phosphate transaminase                                       | Downstream | 177552: C DI <sup>b</sup>                                                               |                                                           |
| WP_143759813.1 | Filamentous hemagglutinin N-terminal domain-containing protein, partial | Exonic     | 9072: GCC DI <sup>b</sup>                                                               | 1494: Ala→no                                              |
| WP_009722103.1 | RHS repeat-associated core domain-containing protein                    | Exonic     | 919430:G→T                                                                              | 3: Gln→Thr                                                |
| WP_009722684.1 | Indole-3-glycerol phosphate synthase TrpC                               | Upstream   | 616205:G→A<br>616358:A→G<br>616372:G→A                                                  |                                                           |
| WP_186004630.1 | Malate dehydrogenase                                                    | Exonic     | 546801: C→T                                                                             | 14: Val→Ala                                               |
| WP_009723822.1 | PAAR domain-containing protein, partial                                 | Exonic     | 127706:T→G<br>127708:G→A                                                                | 3: Leu→Phe<br>2: Asp→Gly                                  |
| WP_009724074.1 | SOS response-associated peptidase                                       | Upstream   | 71786:G→C                                                                               |                                                           |
| WP_009724730.1 | Type VI secretion system tip protein VgrG                               | Exonic     | 196008:C→T                                                                              | 485: Lys→Glu                                              |
| WP_009724776.1 | Pyruvate dehydrogenase (acetyl-transferring), E1, homodimeric type      | Exonic     | 3234:G→A 3237:T→C                                                                       | 130: Gly→Gly<br>129: Lys→Lys                              |
| WP_009724787.1 | YadA-like family protein, partial                                       | Exonic     | 15998:C→A<br>16006:G→A<br>16172:G→A<br>16283:A→G                                        | 125: Ser→Ser<br>88: Ser→Ser<br>33: Val→Lys<br>30: Ser→Ser |
| WP_009724794.1 | OmpA family protein                                                     | Upstream   | 19715:C→T<br>19716:T→G<br>19728:G→A<br>19731:A→G<br>19732:G→A<br>20622:A→G<br>21072:G→A |                                                           |
| WP_009724795.1 | YadA-like family protein                                                | Upstream   | 35601:G→A<br>35841:A→G                                                                  |                                                           |

|                |                                         |            |                 |              |
|----------------|-----------------------------------------|------------|-----------------|--------------|
|                |                                         |            | 35877:A→G       |              |
|                |                                         |            | 35898:A→G       |              |
|                |                                         |            | 35933:C→T       |              |
|                |                                         |            | 35937:C→G       |              |
|                |                                         |            | 35939:C→T       |              |
|                |                                         |            | 35944:G→C       |              |
|                |                                         |            | 35976:A→T       |              |
| WP_009724798.1 | Hypothetical protein                    | Upstream   | 42545:T→C       |              |
| WP_009724802.1 | YadA-like family protein, partial       | Downstream | 51723:G→A       |              |
|                |                                         |            | 51726:A→G       |              |
|                |                                         |            | 51729:T→C       |              |
|                |                                         |            | 51735:C→A       |              |
|                |                                         |            | 51741:G→A       |              |
|                |                                         |            | 51744:G→A       |              |
|                |                                         |            | 59745:G→T       |              |
|                |                                         |            | 59973:G→A       |              |
|                |                                         |            | 59994:G→A       |              |
| WP_083817087.1 | Histidinol-phosphate transaminase       | Downstream | 177724:G→T      |              |
| WP_009724919.1 |                                         | Upstream   | 55:C→A          |              |
|                |                                         |            | 59:G→A          |              |
|                |                                         |            | 65:T→C          |              |
|                |                                         |            | 66:T→A          |              |
|                |                                         |            | 230:A→G         |              |
| WP_143759810.1 | 23S rRNA                                | Exonic     | 26667:G→A       | 119: Arg→Arg |
|                | (cytidine(2498)-2'-O)-methyltransferase |            | 26880:C→G       | 190: Tyr→Tyr |
|                | RlmM                                    |            |                 |              |
| WP_143759810.1 | RHS repeat-associated core              | Downstream | 28931:C→G       |              |
|                | domain-containing protein               |            | 28933:C→T       |              |
| WP_009725065.1 | Hemolysin, partial                      | Exonic     | 582:C→A         | 85: Ala→Thr  |
|                |                                         |            | 591:T→C         | 88: Asp→Tyr  |
| WP_009725067.1 | Adhesin/hemolysin, partial              | Exonic     | 214:T→C 371:A→G | 66: Ala→Val  |
|                |                                         |            |                 | 119: Arg→Arg |

<sup>a</sup> In, insertion.

<sup>b</sup> DI, deletion
